# Supplementary material for: Differential pulse voltametric detection of dopamine using polyaniline-functionalized graphene oxide/silica nanocomposite for point-of-care diagnostics
Source: Royal Society of Chemistry journal article supplement (doi:10.1039/d5ra00714c), 2025-01-01
Supplement: d5ra00714c1.pdf [file d5ra00714c1.pdf]

## **Supplementary Material**

### **Differential pulse voltametric detection of dopamine using polyaniline-functionalized graphene oxide/silica nanocomposite for point-of-care diagnostics**

**Ankita Tejawani<sup>1</sup>, Urvashi Sonkar<sup>1</sup>, Kamlesh Shrivastava<sup>1\*</sup>, Khushali Tandey<sup>1</sup>, Indrapal Karbhal<sup>1</sup>, Manas Kanti Deb<sup>1</sup>, Shamsh Pervez<sup>1</sup>**

<sup>1</sup>School of Studies in Chemistry, Pt. Ravishankar Shukla University, Raipur, CG, 492010, India

Corresponding author \*E-mail: kshrivas@gmail.com

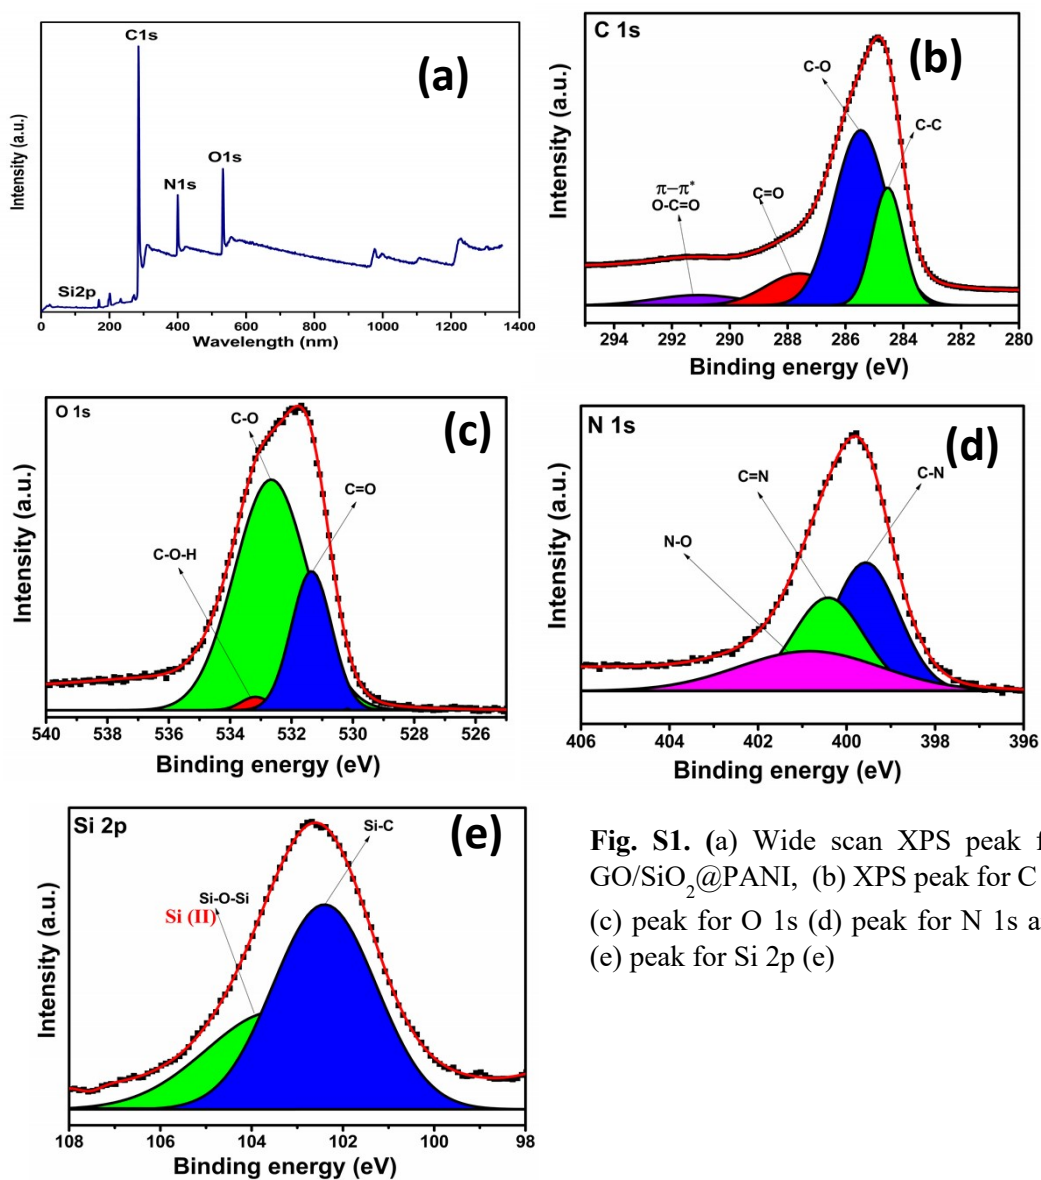

**Fig. S1.** (a) Wide scan XPS peak for GO/SiO<sub>2</sub>@PANI, (b) XPS peak for C 1s (c) peak for O 1s (d) peak for N 1s and (e) peak for Si 2p (e)

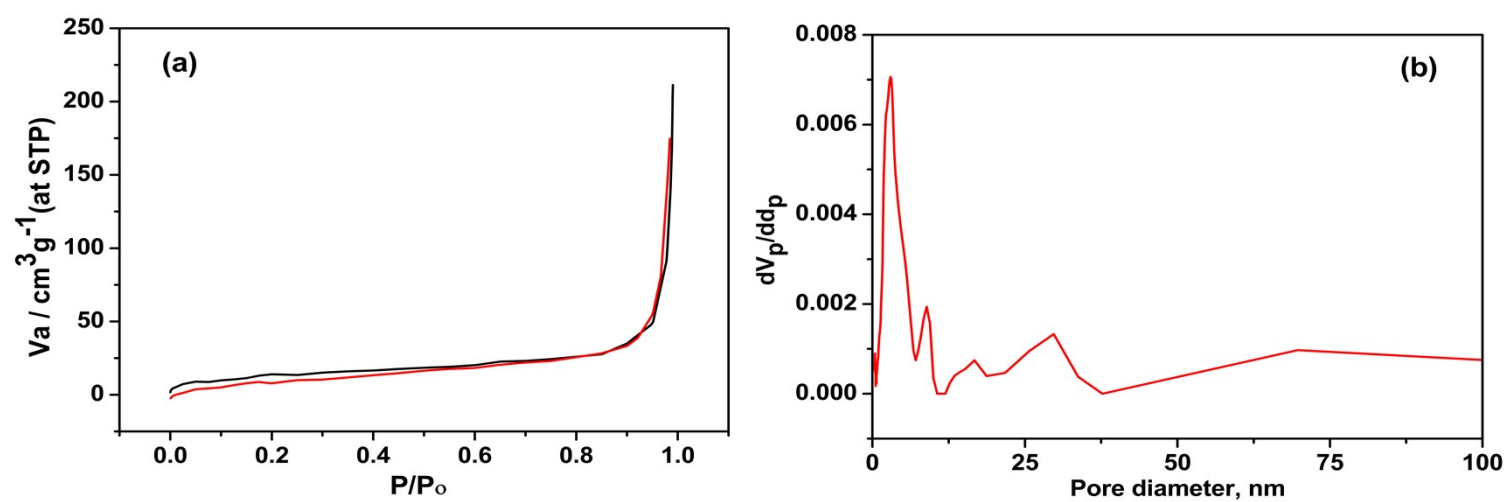

**Figure S2.** Nitrogen adsorption-desorption isotherm (a) and pore size distribution (b) of GO/SiO<sub>2</sub>@PANI.

**Table S1.** Surface area, total pore volume and pore radius of GO/SiO<sub>2</sub>@PANI.

| Materials                 | Surface Area (m <sup>2</sup> g <sup>-1</sup> ) | Total Pore Volume (cm <sup>3</sup> g <sup>-1</sup> ) | Pore Radius (nm) |
|---------------------------|------------------------------------------------|------------------------------------------------------|------------------|
| GO/SiO <sub>2</sub> @PANI | 56.88                                          | 0.3187                                               | 11.22            |

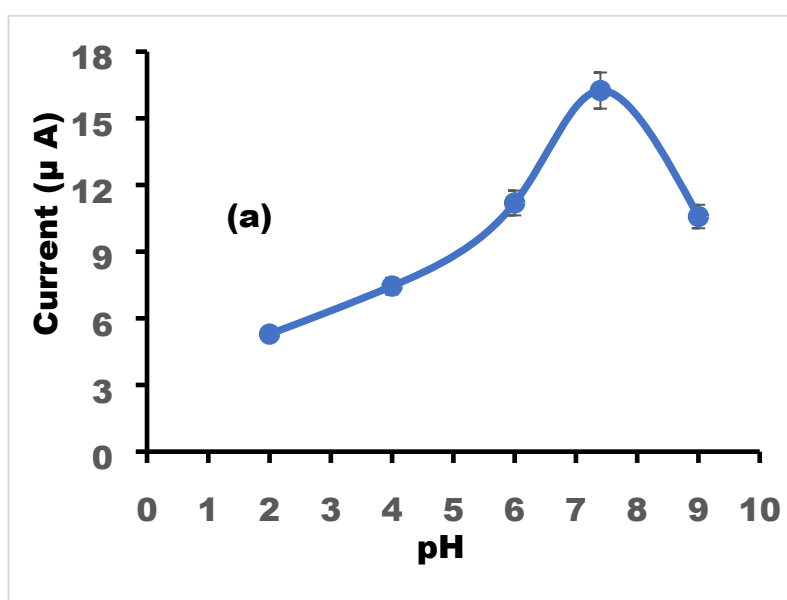

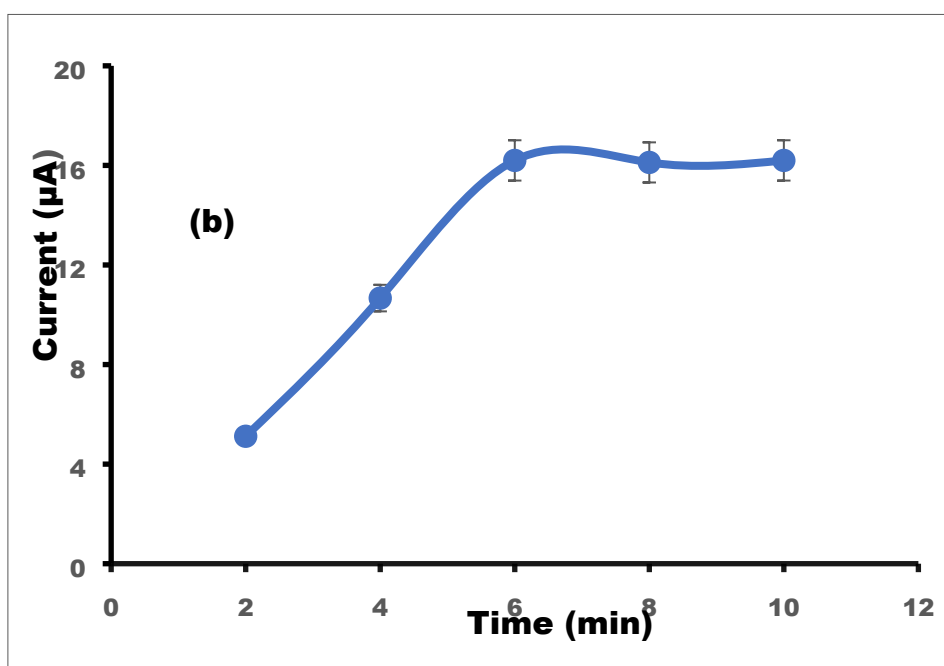

**Fig. S3(a)** Showing the current response of 12  $\mu\text{M}$  dopamine for different pH at GO/SiO<sub>2</sub>@PANI electrode. **(b)** Showing the optimization of time for adsorption of dopamine at the modified electrode.

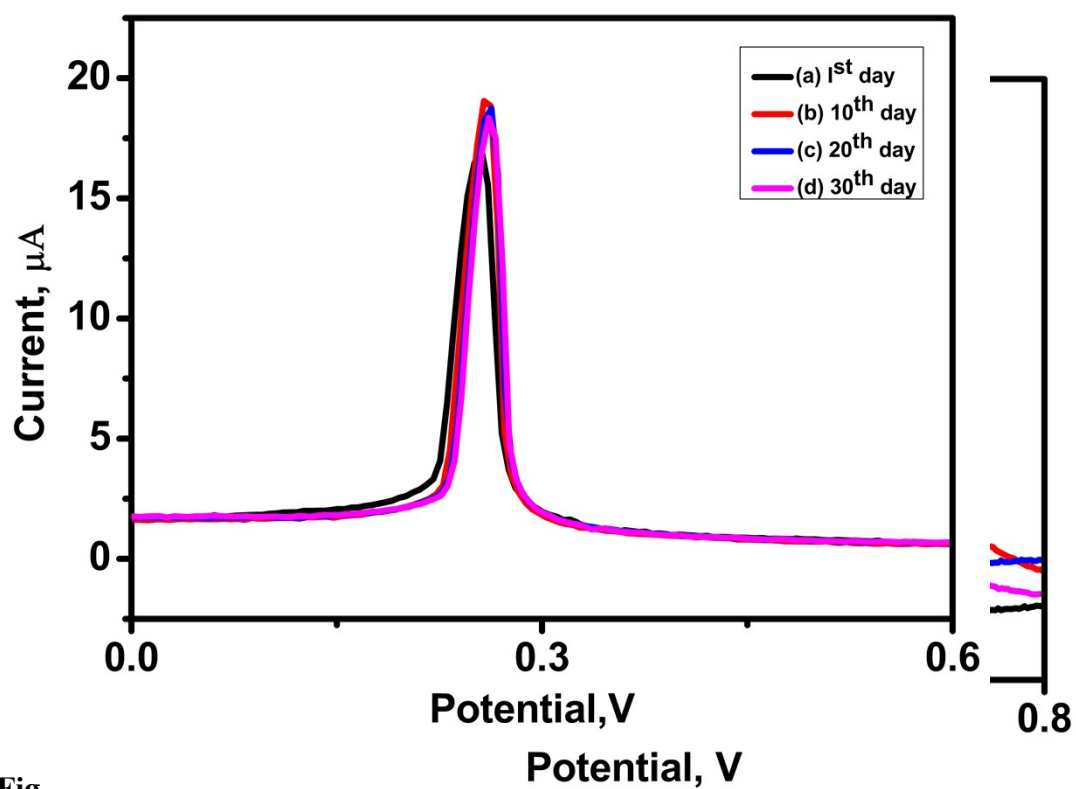

Fig.

S4.

Repeatability of GO/SiO<sub>2</sub>@PANI electrode for measurement of 12 μM dopamine in PBS buffer at 1<sup>st</sup> day, 10<sup>th</sup> day, 20<sup>th</sup> day and 30<sup>th</sup> day.

**Fig. S5.** DPV (a) 1 mM ascorbic acid, (b) 1 mM uric acid, (c) 1 mM glucose, and (d) DPV of dopamine (10  $\mu$ M) in the presence of ascorbic acid, uric acid, glucose and PBS buffer (pH 7.4)
